# Supplementary material for: Effective Perturbations on the Amplitude and Hysteresis of Erg-Mediated Potassium Current Caused by 1-Octylnonyl 8-[(2-hydroxyethyl)[6-oxo-6(undecyloxy)hexyl]amino]-octanoate (SM-102), a Cationic Lipid
Source: MDPI journal article supplement (doi:10.3390/biomedicines9101367), 2021-10-01
Supplement: s1 [file s1]

## Supplementary Information regarding chemical structure of SM-102, spermine, and glyceryl nonivamide (GLNVA) used in this study

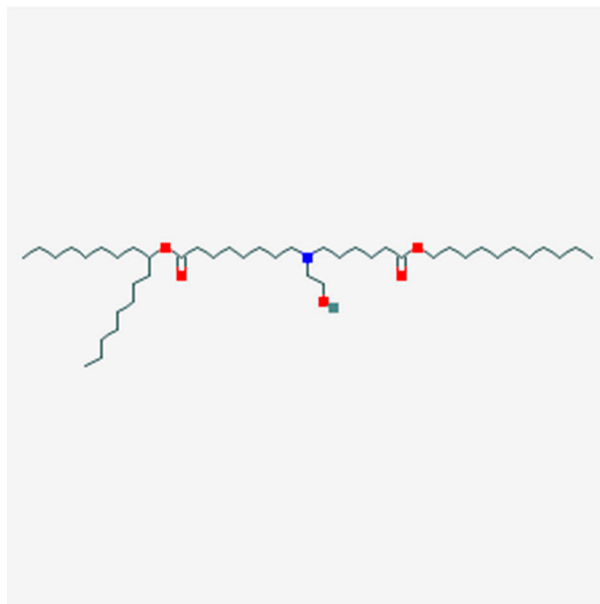

**Figure S1.** Chemical structure for SM-102 (heptadecan-9-yl 8-((2-hydroxyethyl)(6-oxo-6-(undecyloxy)hexyl)amino)octanoate, 4-hydroxybutyl)azanediyl)bis(hexane-6,1-diyl)bis(2-hexyldecanoate, 1-octylnonyl 8-[(2-hydroxyethyl)[6-oxo-6-(undecyloxy)hexyl]amino]-octanoate). The structure was originally derived from <https://pubchem.ncbi.nlm.nih.gov/compound/126697616>.

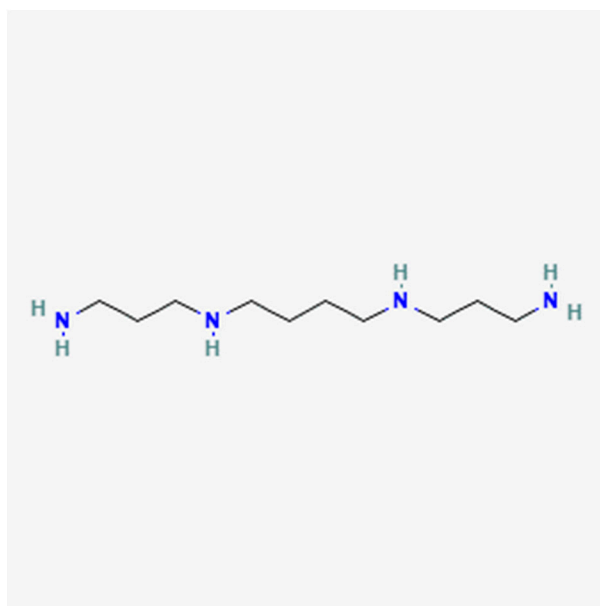

**Figure S2.** Chemical structure for spermine (N,N'-bis(3-aminopropyl)-1,4-diaminobutane). The structure was originally derived from <https://pubchem.ncbi.nlm.nih.gov/compound/126697616>.<https://pubchem.ncbi.nlm.nih.gov/compound/1103>.

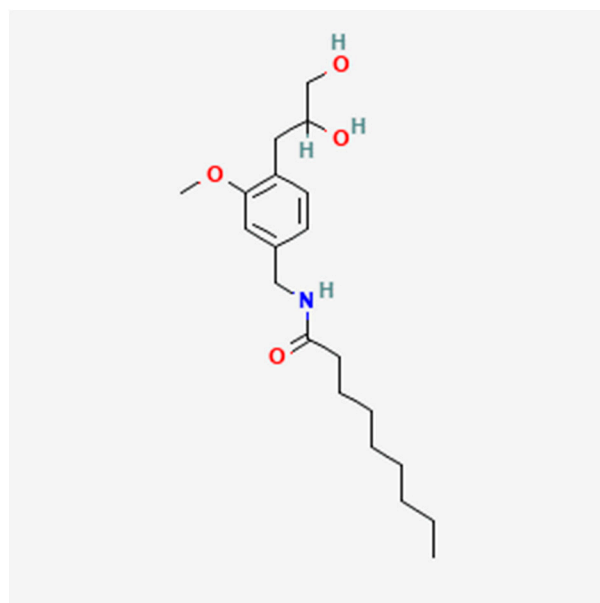

**Figure S3.** Chemical structure of glyceryl nonivamide (GLNVA). The structure was originally derived from <https://pubchem.ncbi.nlm.nih.gov/compound/3035784>.
